# Supplementary material
Source: publisher site journal article supplement (https://e-cmh.org/upload/media/cmh-2023-0121-Supplementary-7.pdf)
Supplement: Supplementary file 1 [file cmh-2023-0121-Supplementary-7.pdf]

**Appendix 7.** Calibration of REACH-B, mPAGE-B, CAMD and REAL-B models at different on-treatment timepoints

**Supplementary Table 7-1.** Brier score of Risk prediction model scores

| MODEL   | Year 2.5<br>(n=660) | Year 3<br>(n=640) | Year 3.5<br>(n=622) | Year 4<br>(n=603) | Year 4.5<br>(n=589) | Year 5<br>(n=562) |
|---------|---------------------|-------------------|---------------------|-------------------|---------------------|-------------------|
| REACH-B | 0.048               | 0.044             | 0.043               | 0.031             | 0.032               | 0.023             |
| mPAGE-B | 0.052               | 0.046             | 0.047               | 0.039             | 0.040               | 0.035             |
| CAMD    | 0.045               | 0.041             | 0.041               | 0.031             | 0.032               | 0.024             |
| REAL-B  | 0.046               | 0.041             | 0.041               | 0.030             | 0.031               | 0.022             |

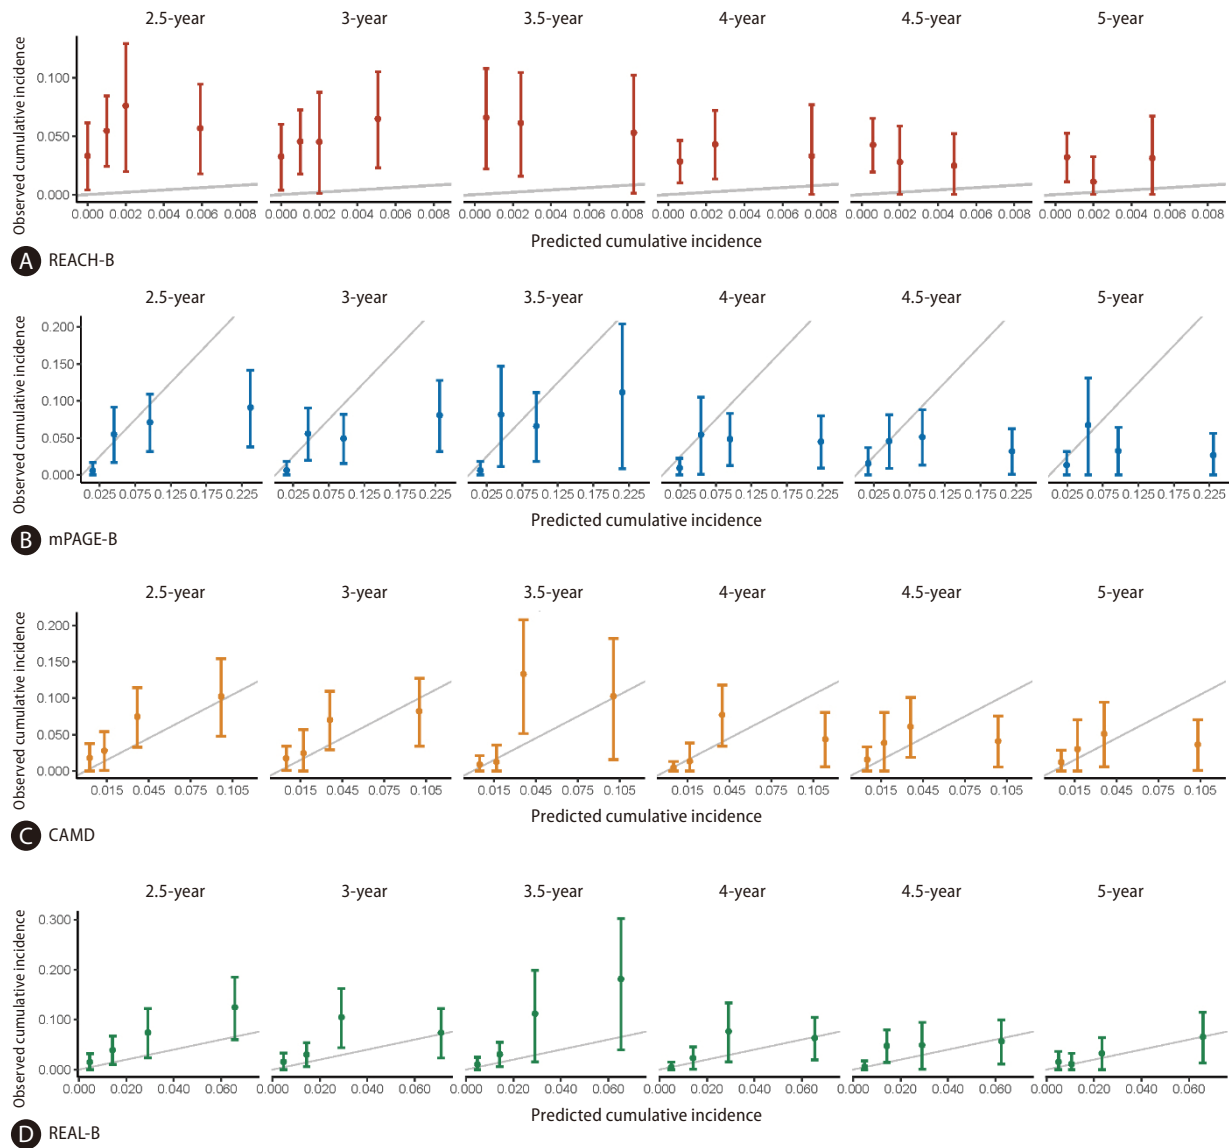

**Supplementary Figure 7-2.** Calibration plot of REACH-B, mPAGE-B, CAMD and REAL-B models at different on-treatment timepoints. The calibration plot revealed that REACH-B continuously underestimated HCC risks at all timepoints. For mPAGE-B, CAMD and REAL-B, the HCC risks were only well calibrated for patients at the low- and relatively low-risk quantiles predicted by serial on-treatment model scores.
